# Supplementary material for: Effective Components and Molecular Mechanism of Agarwood Essential Oil Inhalation and the Sedative and Hypnotic Effects Based on GC-MS-Qtof and Molecular Docking
Source: MDPI journal article supplement (doi:10.3390/molecules27113483), 2022-05-28
Supplement: s1 [file s1]

# Supplementary materials: Establishment of HS-SPME-GC-QTOF analysis method and Molecular docking data

## 1. Fiber coating

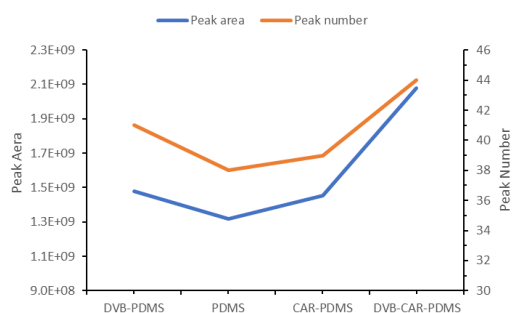

**Figure S1.** Effect of SPME fiber coating on the peak area and number of agarwood oil sample. (extraction temperature=40°C; extraction time=15min; desorption time=3min. The data were represented by the average of three replicate measurements.)

## 2. Extraction temperature

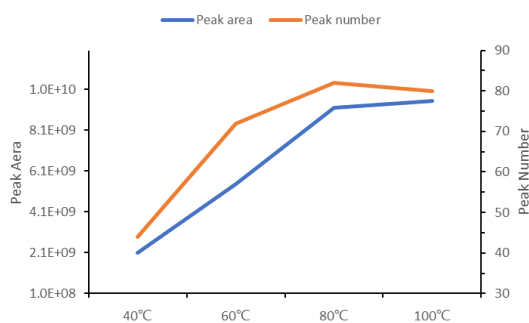

(a)

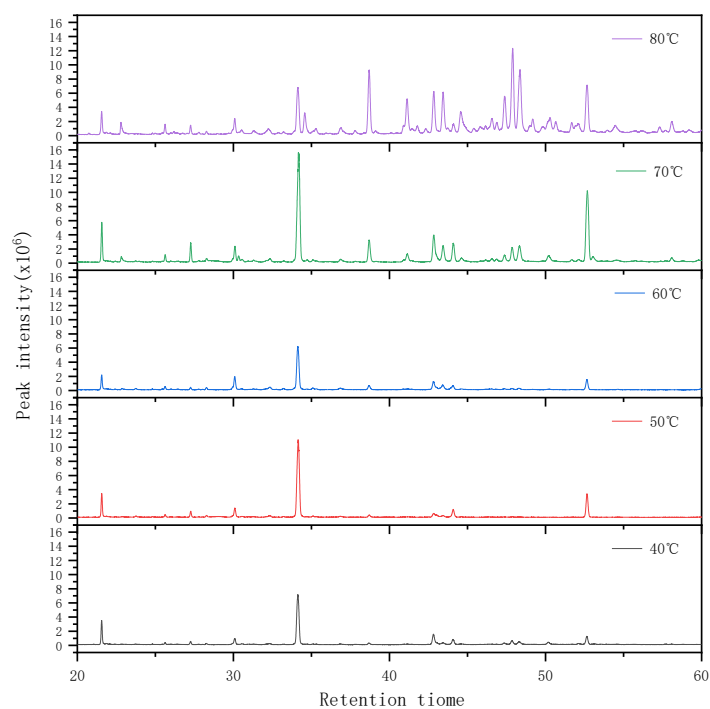

(b)

**Figure S2. (a)** Effect of extraction time on the peak area and number of agarwood oil sample by using DVB/CAR/PDMS fiber. (extraction time=15min; desorption time=3min. The data were represented by the average of three replicate measurements.) **(b)** The TIC chromatograph of different extraction temperature on serum sample by using DVB/PDMS fiber.

### 3. Extraction time

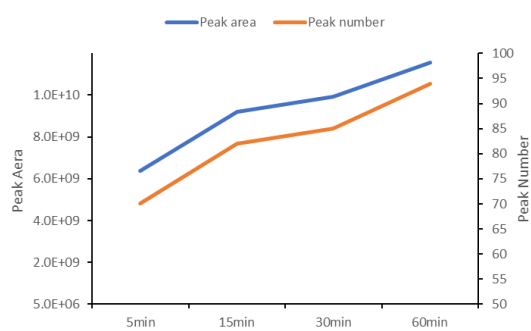

(a)

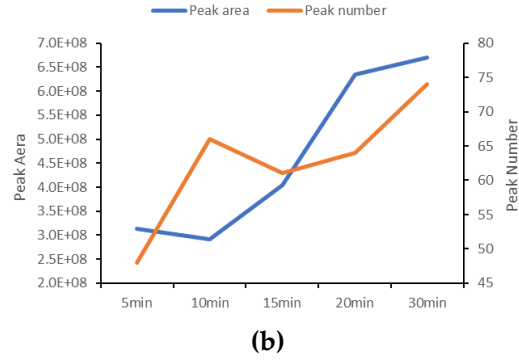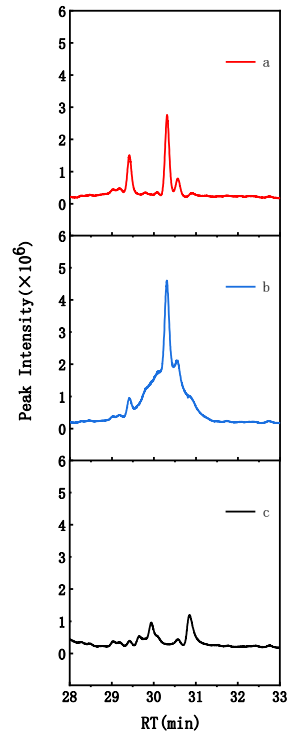

**Figure S3.** (a) Effect of extraction time on the peak area and number of agarwood oil sample by using DVB/CAR/PDMS fiber. (extraction temperature=80°C; desorption time=3min. The data were represented by the average of three replicate measurements.) (b) Effect of extraction time on the peak area and number of serum sample by using DVB/PDMS fiber. (extraction temperature=80°C; NaCl concentration=20mg. The data were represented by the average of two replicate measurements.) (c) Comparative TIC chromatograph analysis of different extraction time and salt concentration in RT29min-RT32min by using DVB/PDMS fiber. (a: extraction time=20min, NaCl concentration=20mg; b: extraction time=20min, NaCl concentration=30mg; c: extraction time=30min, NaCl concentration=30mg;)

#### 4. Salt concentration

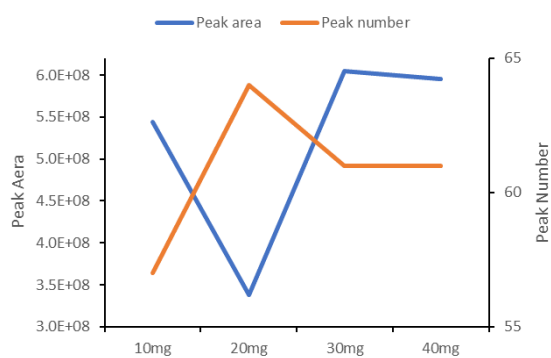

**Figure S4.** Effect of salt concentration on the peak area and number of serum sample by using DVB/PDMS fiber. (extraction temperature=80°C; extraction time=20min. The data were represented by the average of two replicate measurements.)

**Table S1.** Chemical composition of the 79 compounds putatively identified in agarwood oil sample.

| Number | RT     | Formula | Compound                                                                                                     | Peak area/% | CAS          | Similarity |
|--------|--------|---------|--------------------------------------------------------------------------------------------------------------|-------------|--------------|------------|
| 1      | 7.169  | C8H10O  | Benzene, (methoxymethyl)-                                                                                    | 0.16        | 538-86-3     | 76.53      |
| 2      | 7.938  | C7H6O   | Benzaldehyde                                                                                                 | 0.29        | 100-52-7     | 87.2       |
| 3      | 11.59  | C10H16O | Carveol                                                                                                      | 1.43        | 99-48-9      | 75.54      |
| 4      | 12.075 | C9H10O  | Benzene, 1-ethenyl-4-methoxy-                                                                                | 0.07        | 637-69-4     | 84.1       |
| 5      | 16.047 | C12H18  | 6,7-Dimethyl-1,2,3,5,8,8a-hexahydronaphthalene                                                               | 0.1         | 107914-92-1  | 81.54      |
| 6      | 16.433 | C10H12O | Benzenepropanal, .beta.-methyl-                                                                              | 2.43        | 16251-77-7   | 85.35      |
| 7      | 16.948 | C10H12O | 2-Butanone, 4-phenyl-                                                                                        | 0.11        | 2550-26-7    | 84.73      |
| 8      | 18.921 | C11H10  | Naphthalene, 2-methyl-                                                                                       | 0.24        | 91-57-6      | 71.57      |
| 9      | 19.845 | C11H10  | Naphthalene, 1-methyl-                                                                                       | 0.11        | 90-12-0      | 80.92      |
| 10     | 21.425 | C11H16O | 4-(2-Methyl-cyclohex-1-enyl)-but-3-en-2-one                                                                  | 0.29        | 41437-92-7   | 79.26      |
| 11     | 22.114 | C12H18O | 2,7-Methanonaphthalene-3-methanol,<br>1,2,3,4,4a,7,8,8a-octahydro-                                           | 0.09        | 56045-33-1   | 80.62      |
| 12     | 24.529 | C15H24  | Bicyclo[5.2.0]nonane,<br>4-methylene-2,8,8-trimethyl-2-vinyl-                                                | 0.19        | 1000159-38-2 | 81.55      |
| 13(Z1) | 24.835 | C15H24  | Bicyclo[5.2.0]nonane,2-methylene-4,8,8-trimethyl-<br>4-vinyl-                                                | 0.68        | 242794-76-9  | 81.02      |
| 14(Z2) | 25.656 | C14H24O | Spiro[2.5]octane,5,5-dimethyl-4-(3-oxobutyl)-                                                                | 1.72        | 77143-32-9   | 79.02      |
| 15     | 26.694 | C15H22O | (1aR,4aS,8aS)-4a,8,8-Trimethyl-1,1a,4,4a,5,6,7,8-o<br>ctahydrocyclopropa[d]naphthalene-2-carbaldehyde        | 0.08        | 470-41-7     | 79.55      |
| 16     | 27.13  | C15H22O | Ylangenal                                                                                                    | 0.07        | 41610-68-8   | 80.72      |
| 17     | 27.785 | C15H24  | .alpha.-Guaiene                                                                                              | 0.61        | 3691-12-1    | 87.15      |
| 18     | 28.058 | C15H24  | 4,7-Methanoazulene,<br>1,2,3,4,5,6,7,8-octahydro-1,4,9,9-tetramethyl-,<br>[1S-(1.alpha.,4.alpha.,7.alpha.)]- | 0.34        | 514-51-2     | 84.92      |
| 19(Z3) | 28.327 | C15H24O | (1R,3aR,5aR,9aS)-1,4,4,7-Tetramethyl-1,2,3,3a,4,5<br>a18,9-octahydrocyclopenta[c]benzofuran                  | 1.54        | 104188-25-2  | 76.87      |
| 20     | 28.7   | C15H24  | (4S,4aR,6R)-4,4a-Dimethyl-6-(prop-1-en-2-yl)-1,2,<br>3,4,4a,5,6,7-octahydronaphthalene                       | 0.22        | 54868-40-5   | 85.01      |
| 21     | 28.972 | C15H24O | (1R,4S,5S)-1,8-Dimethyl-4-(prop-1-en-2-yl)spiro[4<br>.5]dec-7-ene                                            | 0.08        | 43219-80-3   | 83.99      |
| 22     | 29.268 | C15H24O | Caryophyllene oxide                                                                                          | 0.14        | 1139-30-6    | 82.24      |
| 23(Z4) | 30.27  | C15H24O | 1H-Cycloprop[e]azulen-7-ol,decahydro-1,1,7-trime<br>thyl-4-methylene-,[1aR-(1aα,4aα,7β,7aβ,7bα)]-            | 4.87        | 6750-60-3    | 89.51      |
| 24     | 30.363 | C15H24O | Tricyclo[5.2.2.0(1,6)]undecan-3-ol,<br>2-methylene-6,8,8-trimethyl-                                          | 3.47        | 1000159-37-6 | 86.33      |
| 25(Z5) | 30.592 | C15H24  | 4a,8-Dimethyl-2-(prop-1-en-2-yl)-1,2,3,4,4a,5,6,7-<br>octahydronaphthalene                                   | 1.24        | 103827-22-1  | 78.54      |
| 26     | 31.184 | C15H24  | .beta.-Guaiene                                                                                               | 0.17        | 88-84-6      | 87.53      |
| 27(Z6) | 31.39  | C15H24  | (1R,3aS,8aS)-7-Isopropyl-1,4-dimethyl-1,2,3,3a,6,8<br>a-hexahydroazulene                                     | 2.2         | 36577-33-0   | 88.25      |

|         |        |              |                                                                                                                                                    |      |              |       |
|---------|--------|--------------|----------------------------------------------------------------------------------------------------------------------------------------------------|------|--------------|-------|
| 28(Z7)  | 32.468 | C15H26O      | 2H-3,9a-Methano-1-benzoxepin,octahydro-2,2,5a,9-tetramethyl-,[3R(3 $\alpha$ ,5 $\alpha\alpha$ ,9 $\alpha$ ,9 $\alpha\alpha$ )]-                    | 4.92 | 5956-09-2    | 88.55 |
| 29(Z8)  | 33.29  | C15H24O      | (R)-2-((4aS,8aR)-4a-Methylene-1,4,4a,5,6,7,8,8a-octahydronaphthalen-2-yl)propan-1-ol                                                               | 1.36 | 28102-68-3   | 74.9  |
| 30      | 34.051 | C15H24O      | 2-(4a,8-Dimethyl-1,2,3,4,4a,5,6,7-octahydro-naphthalen-2-yl)-prop-2-en-1-ol                                                                        | 2.51 | 1000190-51-8 | 83.57 |
| 31(Z9)  | 35.235 | C15H26O      | 1,4-Dimethyl-7-(prop-1-en-2-yl)decahydroazulen-4-ol                                                                                                | 1.73 | 21698-41-9   | 76.36 |
| 32(Z10) | 35.445 | C15H26O<br>2 | Cedran-diol,(8S,14)-                                                                                                                               | 1.38 | 62600-05-9   | 85.16 |
| 33      | 36.23  | C24H40O<br>2 | 10,12-Tricosadiynoic acid, methyl ester                                                                                                            | 0.38 | 1000333-59-4 | 81.06 |
| 34(Z11) | 36.982 | C15H24O      | 2-((2R,4aR,8aR)-4a,8-Dimethyl-1,2,3,4,4a,5,6,8a-octahydronaphthalen-2-yl)prop-2-en-1-ol                                                            | 3.56 | 65018-15-7   | 89.11 |
| 35      | 38.066 | C15H24       | Bicyclo[5.3.0]decane,<br>2-methylene-5-(1-methylvinyl)-8-methyl-                                                                                   | 0.93 | 1000159-39-3 | 90.35 |
| 36(Z12) | 39.021 | C15H26O      | 2-((4aS,8R,8aR)-4a,8-Dimethyl)-3,4,4a,5,6,7,8,8a-octahydronaphthalen-2-yl)propan-2-ol                                                              | 6.31 | 194607-96-0  | 71.71 |
| 37(Z13) | 40.547 | C15H24O      | 2-((2R,4aR,8aS)-4a-Methyl-8-methylenedecahydronaphthalen-2-yl)prop-2-en-1-ol                                                                       | 0.15 | 515-20-8     | 81.27 |
| 38(Z14) | 41.286 | C15H24O      | (E)-2-((8R,8aS)-8,8a-Dimethyl-3,4,6,7,8,8a-hexahydronaphthalen-2(1H)-ylidene)propan-1-ol                                                           | 4.71 | 22387-74-2   | 75.9  |
| 39(Z15) | 41.758 | C15H24O      | Aristol-1(10)-en-9-ol                                                                                                                              | 3.39 | 1372763-27-3 | 79.1  |
| 40      | 42.397 | C15H24O      | Alloaromadendrene oxide-(1)                                                                                                                        | 0.31 |              |       |
| 41      | 42.656 | C15H24O      | 7-Oxabicyclo[4.1.0]heptane,<br>2,2,6-trimethyl-1-(3-methyl-1,3-butadienyl)-5-methylene-                                                            | 0.22 | 70038-20-9   | 79.73 |
| 42      | 43.072 | C15H24O      | .beta.-Oplopenone                                                                                                                                  | 0.28 | 28305-60-4   | 85.07 |
| 43      | 43.255 | C23H34O<br>2 | 4,7,10,13,16,19-Docosahexaenoic acid, methyl ester, (all-Z)-                                                                                       | 0.11 | 2566-90-7    | 82.21 |
| 44(Z16) | 43.614 | C15H24O      | Aromadendrene oxide-(2)                                                                                                                            | 0.9  | 1000156-12-7 | 82.29 |
| 45      | 44.266 | C15H24       | .gamma.-HIMACHALENE                                                                                                                                | 0.2  | 1000140-08-0 | 87.3  |
| 46(Z17) | 44.858 | C15H24       | 1H-Cyclopropa[a]naphthalene,decahydro-1,1,3a-trimethyl-7-methylene-,[1aS-(1 $\alpha\alpha$ ,3 $\alpha\alpha$ ,7 $\alpha\beta$ ,7 $\beta\alpha$ )]- | 3.61 | 20071-49-2   | 89    |
| 47      | 45.041 | C15H26O      | 1H-Benzocyclohepten-7-ol,<br>2,3,4,4a,5,6,7,8-octahydro-1,1,4a,7-tetramethyl-,<br>cis-                                                             | 1.4  | 6892-80-4    | 85.68 |
| 48      | 45.61  | C15H24O      | Cedren-13-ol, 8-                                                                                                                                   | 0.28 | 18319-35-2   | 83.49 |
| 49(Z18) | 45.999 | C15H24       | 1H-Cyclopropa[a]naphthalene,1a,2,3,3a,4,5,6,7b-octahydro-1,1,3a,7-tetramethyl-,[1aR-(1 $\alpha\alpha$ ,3 $\alpha\alpha$ ,7 $\beta\alpha$ )]-       | 0.19 | 489-29-2     | 92    |
| 50(Z19) | 46.378 | C15H24       | Guaia-1(10),11-diene                                                                                                                               | 0.66 | 3691-11-0    | 93.79 |
| 51(Z20) | 46.874 | C15H24       | $\beta$ -Guaiene                                                                                                                                   | 1.76 | 88-84-6      | 85.53 |
| 52(Z21) | 47.25  | C15H24       | (-)-Aristolene                                                                                                                                     | 1.8  | 6831-16-9    | 85.71 |

|         |        |              |                                                                                                                                    |      |              |       |
|---------|--------|--------------|------------------------------------------------------------------------------------------------------------------------------------|------|--------------|-------|
| 53(Z22) | 47.712 | C15H26O      | 1H-Cycloprop[e]azulen-4-ol,decahydro-1,1,4,7-tetramethyl-, [1aR-(1a $\alpha$ ,4 $\beta$ ,7 $\alpha$ ,7a $\beta$ ,7b $\alpha$ )]-   | 1.48 | 552-02-3     | 86.63 |
| 54(Z23) | 48.361 | C15H24       | Naphthalene,1,2,3,5,6,7,8,8a-octahydro-1,8a-dimethyl-7-(1-methylethenyl)-,[1S-(1 $\alpha$ ,7 $\alpha$ ,8a $\alpha$ )]-             | 4.06 | 10219-75-7   | 90.93 |
| 55      | 48.873 | C15H24       | Azulene,<br>1,2,3,3a,4,5,6,7-octahydro-1,4-dimethyl-7-(1-methylethenyl)-, [1R-(1.alpha.,3a.beta.,4.alpha.,7.beta.)]-               | 2.95 | 22567-17-5   | 92.06 |
| 56      | 48.906 | C15H24       | Longifolene                                                                                                                        | 1.38 | 475-20-7     | 93.68 |
| 57      | 50.286 | C15H22       | 3,5,11-Eudesmatriene                                                                                                               | 1.6  | 193615-07-5  | 86.42 |
| 58      | 50.516 | C15H22O<br>2 | 7-(1,3-Dimethylbuta-1,3-dienyl)-1,6,6-trimethyl-3,8-dioxatricyclo[5.1.0.0(2,4)]octane                                              | 1.58 | 1000190-22-7 | 84.99 |
| 59(Z24) | 50.822 | C15H24O      | Tricyclo[4.4.0.0(2,7)]dec-8-ene-3-methanol, $\alpha$ , $\alpha$ ,6,8-tetramethyl-,stereoisomer                                     | 2.33 | 41370-56-3   | 76.55 |
| 60      | 51.131 | C15H24O      | 4a,5-Dimethyl-3-(prop-1-en-2-yl)-1,2,3,4,4a,5,6,7-octahydronaphthalen-1-ol                                                         | 0.67 | 61847-19-6   | 89.41 |
| 61      | 52.239 | C15H22O<br>3 | Hydroxyvalerenic acid                                                                                                              | 7.11 | 1619-16-5    | 83.34 |
| 62      | 52.718 | C15H22O<br>2 | Curcumenol                                                                                                                         | 0.11 | 19431-84-6   | 80.88 |
| 63      | 52.971 | C15H22O      | 1(2H)-Naphthalenone,<br>3,4,4a,5,6,7-hexahydro-4a,5-dimethyl-3-(1-methylethenyl)-, [3S-(3.alpha.,4a.alpha.,5.alpha.)]-             | 0.7  | 562-23-2     | 84.88 |
| 64      | 53.506 | C15H24O<br>2 | Bicyclo[4.4.0]dec-2-ene-4-ol,<br>2-methyl-9-(prop-1-en-3-ol-2-yl)-                                                                 | 0.64 | 1000196-79-7 | 84.67 |
| 65      | 54.604 | C15H24O      | (-)-Spathulenol                                                                                                                    | 0.27 | 77171-55-2   | 82.96 |
| 66      | 55.891 | C15H24O      | (1R,7S,E)-7-Isopropyl-4,10-dimethylenecyclodec-5-enol                                                                              | 0.78 | 81968-62-9   | 84.5  |
| 67      | 56.403 | C15H22O      | (1aR,4aS,8aS)-4a,8,8-Trimethyl-1,1a,4,4a,5,6,7,8-octahydrocyclopropa[d]naphthalene-2-carbaldehyde                                  | 0.13 | 470-41-7     | 85.43 |
| 68      | 56.975 | C15H22O      | 4,6,6-Trimethyl-2-(3-methylbuta-1,3-dienyl)-3-oxatricyclo[5.1.0.0(2,4)]octane                                                      | 0.15 | 1000190-22-2 | 84.02 |
| 69      | 57.245 | C15H22O      | (E)-3-((4S,7R,7aR)-3,7-Dimethyl-2,4,5,6,7,7a-hexahydro-1H-inden-4-yl)-2-methylacrylaldehyde                                        | 0.29 | 4176-16-3    | 85.79 |
| 70      | 57.993 | C15H22O      | 3-epi-Cedrenal                                                                                                                     | 0.71 | 1000465-27-6 | 84.54 |
| 71      | 58.399 | C15H22O      | 2H-Cyclopropa[a]naphthalen-2-one,<br>1,1a,4,5,6,7,7a,7b-octahydro-1,1,7,7a-tetramethyl-, (1a.alpha.,7.alpha.,7a.alpha.,7b.alpha.)- | 2.87 | 6831-17-0    | 85.68 |
| 72      | 58.855 | C15H22O      | Squamulosone                                                                                                                       | 0.32 | 34413-94-0   | 85.76 |
| 73      | 59.929 | C15H22O      | 2-((2R,4aR,8aR)-4a,8-Dimethyl-1,2,3,4,4a,5,6,8a-octahydronaphthalen-2-yl)acrylaldehyde                                             | 0.8  | 4586-01-0    | 87.9  |
| 74      | 60.435 | C15H24O      | 2-(4a,8-Dimethyl-1,2,3,4,4a,5,6,7-octahydro-naphthalen-2-yl)-prop-2-en-1-ol                                                        | 0.13 | 1000190-51-8 | 81.67 |
| 75      | 60.85  | C15H24O      | 2-((2R,4aR)-4a,8-Dimethyl-1,2,3,4,4a,5,6,7-octahy                                                                                  | 0.1  | 65018-14-6   | 80.89 |

|         |        |              |                                                                                               |      |             |       |
|---------|--------|--------------|-----------------------------------------------------------------------------------------------|------|-------------|-------|
|         |        |              | dronaphthalen-2-yl)prop-2-en-1-ol                                                             |      |             |       |
| 76      | 62.367 | C16H24O<br>2 | Methyl<br>2-((2R,4aR)-4a,8-dimethyl-1,2,3,4,4a,5,6,7-octahydronaphthalen-2-yl)acrylate        | 0.11 | 132342-55-3 | 90.54 |
| 77(Z25) | 63.415 | C15H22O      | 2(3H)-Naphthalenone,4,4a,5,6,7,8-hexahydro-4a,5-dimethyl-3-(1-methylethylidene)-,(4ar-cis)-   | 2.39 | 19598-45-9  | 90.66 |
| 78      | 63.987 | C15H22O<br>2 | Valerenic acid                                                                                | 0.28 | 3569-10-6   | 86.26 |
| 79      | 69.109 | C15H22O<br>2 | (3R,3aR,4aS,5R,9aS)-3,5,8-Trimethyl-3a,4,4a,5,6,7,9,9a-octahydroazuleno[6,5-b]furan-2(3H)-one | 0.08 | 66873-38-9  | 87.15 |

**Table S2.** Docking results of twenty five components with four targets

| Ligand | Receptor | affinity (kcal/mol) |
|--------|----------|---------------------|
| Z1     | GABRA1   | -11                 |
| Z10    | GABRA1   | -11.6               |
| Z11    | GABRA1   | -10.7               |
| Z12    | GABRA1   | -10.9               |
| Z13    | GABRA1   | -9.2                |
| Z14    | GABRA1   | -10.2               |
| Z15    | GABRA1   | -9.4                |
| Z16    | GABRA1   | -11.1               |
| Z17    | GABRA1   | -11.6               |
| Z18    | GABRA1   | -11.5               |
| Z19    | GABRA1   | -10.6               |
| Z2     | GABRA1   | -9.5                |
| Z20    | GABRA1   | -10.5               |
| Z21    | GABRA1   | -11.8               |
| Z22    | GABRA1   | -10.8               |
| Z23    | GABRA1   | -10.7               |
| Z24    | GABRA1   | -9.3                |
| Z25    | GABRA1   | -9.4                |
| Z3     | GABRA1   | -12                 |
| Z4     | GABRA1   | -11.6               |
| Z5     | GABRA1   | -9.8                |
| Z6     | GABRA1   | -10.5               |
| Z7     | GABRA1   | -11.6               |
| Z8     | GABRA1   | -10.7               |
| Z9     | GABRA1   | -8.7                |
| Z1     | GRIA1    | -10                 |
| Z10    | GRIA1    | -10.3               |
| Z11    | GRIA1    | -9.7                |
| Z12    | GRIA1    | -9.7                |
| Z13    | GRIA1    | -9.7                |



|     |       |       |
|-----|-------|-------|
| Z14 | GRIA1 | -9.3  |
| Z15 | GRIA1 | -8.9  |
| Z16 | GRIA1 | -10.7 |
| Z17 | GRIA1 | -10.6 |
| Z18 | GRIA1 | -10.6 |
| Z19 | GRIA1 | -9.6  |
| Z2  | GRIA1 | -8.8  |
| Z20 | GRIA1 | -9.6  |
| Z21 | GRIA1 | -10.7 |
| Z22 | GRIA1 | -9.9  |
| Z23 | GRIA1 | -9.9  |
| Z24 | GRIA1 | -10   |
| Z25 | GRIA1 | -10   |
| Z3  | GRIA1 | -10.5 |
| Z4  | GRIA1 | -10.2 |
| Z5  | GRIA1 | -10.2 |
| Z6  | GRIA1 | -9.6  |
| Z7  | GRIA1 | -10.7 |
| Z8  | GRIA1 | -9.7  |
| Z9  | GRIA1 | -9.2  |
| Z1  | HTR1A | -10.3 |
| Z10 | HTR1A | -10.7 |
| Z11 | HTR1A | -8.4  |
| Z12 | HTR1A | -10.6 |
| Z13 | HTR1A | -8.2  |
| Z14 | HTR1A | -9.8  |
| Z15 | HTR1A | -8.7  |
| Z16 | HTR1A | -10.9 |
| Z17 | HTR1A | -11   |
| Z18 | HTR1A | -11   |
| Z19 | HTR1A | -10.5 |
| Z2  | HTR1A | -8.8  |
| Z20 | HTR1A | -8.5  |
| Z21 | HTR1A | -11.2 |
| Z22 | HTR1A | -10.3 |
| Z23 | HTR1A | -10.1 |
| Z24 | HTR1A | -10.1 |
| Z25 | HTR1A | -10.4 |
| Z3  | HTR1A | -10.8 |
| Z4  | HTR1A | -10.9 |
| Z5  | HTR1A | -10.3 |
| Z6  | HTR1A | -10.5 |
| Z7  | HTR1A | -11.1 |

|     |       |       |
|-----|-------|-------|
| Z8  | HTR1A | -7.7  |
| Z9  | HTR1A | -8    |
| Z1  | HTR2A | -9.5  |
| Z10 | HTR2A | -9.9  |
| Z11 | HTR2A | -9.3  |
| Z12 | HTR2A | -9.8  |
| Z13 | HTR2A | -9.3  |
| Z14 | HTR2A | -8.8  |
| Z15 | HTR2A | -8.4  |
| Z16 | HTR2A | -10.6 |
| Z17 | HTR2A | -10.3 |
| Z18 | HTR2A | -10.3 |
| Z19 | HTR2A | -9.2  |
| Z2  | HTR2A | -8.3  |
| Z20 | HTR2A | -9.2  |
| Z21 | HTR2A | -10.3 |
| Z22 | HTR2A | -9.6  |
| Z23 | HTR2A | -9.7  |
| Z24 | HTR2A | -9.1  |
| Z25 | HTR2A | -9.6  |
| Z3  | HTR2A | -10.7 |
| Z4  | HTR2A | -10.2 |
| Z5  | HTR2A | -9.8  |
| Z6  | HTR2A | -9.2  |
| Z7  | HTR2A | -10.7 |
| Z8  | HTR2A | -9.3  |
| Z9  | HTR2A | -9    |
